# Supplementary material for: An indirect comparison of 144-week efficacy, safety, and tolerability of dolutegravir plus lamivudine and second-generation integrase inhibitor–based, 3-drug, single-tablet regimens in therapy-naive people with HIV-1
Source: Springer Nature journal article supplement (doi:10.1186/s12981-023-00507-1), 2023-03-22
Supplement: MOESM1 [file 24662018]

**ADDITIONAL FILE 1**

**Table S1.** Summary of Study Designs of the Included Trials

| <b>Trial name<br/>(ClinicalTrials.gov<br/>identifier)</b>    | <b>Dosing regimen</b>                                                          | <b>Primary outcome</b>                                                                       |
|--------------------------------------------------------------|--------------------------------------------------------------------------------|----------------------------------------------------------------------------------------------|
| GEMINI-1 and<br>GEMINI-2<br>(NCT02831673 and<br>NCT02831764) | DTG 50 mg + 3TC 300 mg QD<br>OR<br>DTG 50 mg + TDF 300 mg/FTC 200 mg QD        | HIV-1 RNA <50 copies/mL<br>(FDA Snapshot algorithm) at<br>Week 48 in the ITT-E<br>population |
| GS-US-380-1489<br>(NCT02607930)                              | BIC 50 mg/FTC 200 mg/TAF 25 mg QD<br>OR<br>DTG 50 mg/ABC 600 mg/3TC 300 mg QD  | HIV-1 RNA <50 copies/mL<br>(FDA Snapshot algorithm) at<br>Week 48                            |
| GS-US-380-1490<br>(NCT02607956)                              | BIC 50 mg/FTC 200 mg/TAF 25 mg QD<br>OR<br>DTG 50 mg + TAF 25 mg/FTC 200 mg QD | HIV-1 RNA <50 copies/mL<br>(FDA Snapshot algorithm) at<br>Week 48                            |

ABC, abacavir; BIC, bictegravir; DTG, dolutegravir; FDA, US Food and Drug Administration; FTC, emtricitabine; ITT-E, intention-to-treat–exposed; QD, once daily; TAF, tenofovir alafenamide; 3TC, lamivudine; TDF, tenofovir disoproxil fumarate.

**Table S2.** Summary of Baseline Characteristics of the Included Trials

| Baseline parameter,<br>n (%) <sup>a</sup>             | GEMINI-1/-2 (pooled analysis) |                          | GS-US-380-1489         |                        | GS-US-380-1490           |                        |
|-------------------------------------------------------|-------------------------------|--------------------------|------------------------|------------------------|--------------------------|------------------------|
|                                                       | DTG + 3TC<br>(N=716)          | DTG + TDF/FTC<br>(N=717) | BIC/FTC/TAF<br>(N=314) | DTG/ABC/3TC<br>(N=315) | DTG + TAF/FTC<br>(N=325) | BIC/FTC/TAF<br>(N=320) |
| Median age, y                                         | 32                            | 33                       | 31                     | 32                     | 34                       | 33                     |
| Male (sex at birth)                                   | 603 (84)                      | 619 (86)                 | 285 (91)               | 282 (90)               | 288 (89)                 | 280 (88)               |
| Race                                                  |                               |                          |                        |                        |                          |                        |
| White                                                 | 484 (68)                      | 499 (70)                 | 180 (57)               | 179 (57)               | 195 (60)                 | 183 (57)               |
| Black or African American                             | 90 (13)                       | 71 (10)                  | 114 (36)               | 112 (36)               | 100 (31)                 | 97 (30)                |
| Asian                                                 | 71 (10)                       | 72 (10)                  | 6 (2)                  | 10 (3)                 | 10 (3)                   | 7 (2)                  |
| Other                                                 | 71 (10)                       | 75 (10)                  | 14 (4)                 | 14 (4)                 | 20 (6)                   | 33 (10)                |
| Ethnicity, Hispanic/Latinx                            | 215 (30)                      | 232 (32)                 | 72 (23)                | 65 (21)                | 81 (25)                  | 83 (26)                |
| HIV-1 RNA log <sub>10</sub> , copies/mL,<br>mean (SD) | 4.42 (0.66)                   | 4.45 (0.65)              | 4.41 (0.65)            | 4.42 (0.69)            | 4.42 (0.67)              | 4.39 (0.73)            |
| Baseline CD4+ cell count,<br>cells/μL, mean (SD)      | 462 (219.2)                   | 461 (213.1)              | 453 (220.8)            | 476 (231.4)            | 454 (231.5)              | 457 (255.3)            |

ABC, abacavir; BIC, bictegravir; DTG, dolutegravir; FTC, emtricitabine; TAF, tenofovir alafenamide; 3TC, lamivudine; TDF, tenofovir disoproxil fumarate.

<sup>a</sup>Unless otherwise specified.

**Table S3.** Results of the Indirect Treatment Comparison for DTG + 3TC vs BIC/FTC/TAF and DTG/ABC/3TC at Week 144

| Comparison                                      | DTG + 3TC vs BIC/FTC/TAF <sup>a</sup> |            |                        | DTG + 3TC vs DTG/ABC/3TC <sup>b</sup> |                                       |                         |                        |
|-------------------------------------------------|---------------------------------------|------------|------------------------|---------------------------------------|---------------------------------------|-------------------------|------------------------|
|                                                 | Comparative effect measure (95% CI)   | Odds ratio | Risk difference        | Mean change difference                | Odds ratio                            | Risk difference         | Mean change difference |
| Virologic suppression (HIV-1 RNA <50 copies/mL) |                                       |            | 0.1%<br>(-6.9%, 7.2%)  |                                       |                                       | -2.5%<br>(-11.6%, 6.7%) |                        |
| Virologic failure (HIV-1 RNA ≥50 copies/mL)     |                                       |            | -1.3%<br>(-4.8%, 2.1%) |                                       |                                       | -3.5%<br>(-7.6%, 0.5%)  |                        |
| CD4+ cell count change from baseline, cells/μL  |                                       |            |                        | 16.0<br>(-29.3, 61.3)                 |                                       |                         | -4.0<br>(-63.5, 55.5)  |
| All-cause discontinuations                      | 0.83<br>(0.51, 1.37)                  |            |                        |                                       | 0.96<br>(0.50, 1.85)                  |                         |                        |
| Discontinuations due to AEs                     | 0.94<br>(0.26, 3.39)                  |            |                        |                                       | Calculation not possible <sup>c</sup> |                         |                        |
| All AEs                                         | 1.05<br>(0.56, 1.98)                  |            |                        |                                       | 0.81<br>(0.29, 2.27)                  |                         |                        |
| Grade 3-4 AEs                                   | 0.70<br>(0.41, 1.21)                  |            |                        |                                       | 0.71<br>(0.36, 1.41)                  |                         |                        |
| Serious AEs                                     | <b>0.51</b><br><b>(0.29, 0.87)</b>    |            |                        |                                       | <b>0.38</b><br><b>(0.19, 0.75)</b>    |                         |                        |
| Drug-related AEs                                | 1.01<br>(0.66, 1.56)                  |            |                        |                                       | 0.60<br>(0.35, 1.03)                  |                         |                        |

ABC, abacavir; AE, adverse event; BIC, bicitgravir; DTG, dolutegravir; FTC, emtricitabine; TAF, tenofovir alafenamide; 3TC, lamivudine; TDF, tenofovir disoproxil fumarate.

---

<sup>a</sup>Indirect comparison based on data from direct comparisons between DTG + 3TC and DTG + TD(A)F/FTC (GEMINI-1 and GEMINI-2) and between BIC/FTC/TAF and DTG + TD(A)F/FTC (GS-US-380-1490). <sup>b</sup>Indirect comparison based on data from direct comparison between BIC/FTC/TAF and DTG/ABC/3TC (GS-US-380-1489) and indirect comparison between DTG + 3TC and BIC/FTC/TAF. <sup>c</sup>Comparison against DTG/ABC/3TC could not be estimated due to zero events in one treatment group.
